# Supplementary material
Source: PubMed Central journal article supplement (PMC2859524)
Supplement: supp_M109.074617_jbc.M109.074617-1.pdf [file supp_M109.074617_jbc.M109.074617-1.pdf]

## SUPPLEMENTAL FIGURE

### LYSOSOMAL DEGRADATION OF $\alpha$ -SYNUCLEIN *IN VIVO*

Sally K. Mak, Alison L. McCormack, Amy B. Manning-Boğ, Ana Maria Cuervo  
and Donato A. Di Monte

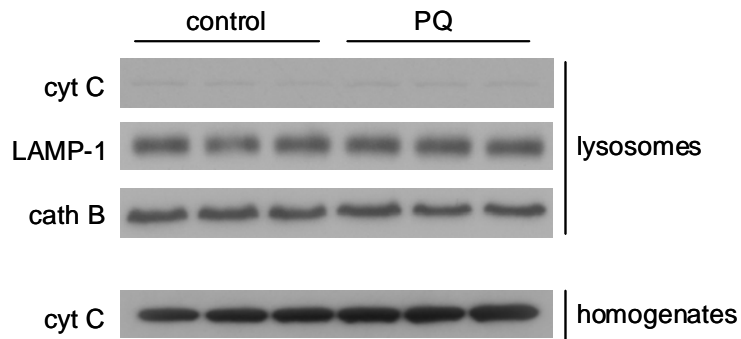

**Supplementary Figure S1.** Purity of the lysosomal fractions. Lysosomes or tissue homogenates were prepared from the midbrain of mice sacrificed 3 days after a single intraperitoneal injection of either saline (control) or 10 mg/kg paraquat (PQ). Western blot analysis was carried out using lysosomal (LAMP-1 and cathepsin B) or mitochondrial (cytochrome C) markers. Lysosomal fractions were enriched in LAMP-1 and cathepsin B. In contrast to tissue homogenates, they were devoid of significant amounts of cytochrome C, indicating lack of mitochondrial contamination.
